# Supplementary material for: Molecular-scale study of Cr(vi) adsorption onto lepidocrocite facets by EXAFS, in situ ATR-FTIR, theoretical frequency calculations and DFT+U techniques
Source: Royal Society of Chemistry journal article supplement (doi:10.1039/d1en01085a), 2022-01-01
Supplement: d1en01085a1.pdf [file d1en01085a1.pdf]

## Supporting Information

# Molecular-scale Study of Cr(VI) Adsorption onto Lepidocrocite Facets by EXAFS, In Situ ATR-FTIR, Theoretical Frequency Calculations and DFT+U Techniques

Xiaofei Li <sup>a</sup>, Chuling Guo <sup>\*ab</sup>, Xiaohu Jin <sup>a</sup>, Qian Yao <sup>a</sup>, Qianqian Liu <sup>a</sup>, Lijuan Zhang <sup>c</sup>, Guining  
Lu <sup>ab</sup>, John R. Reinfelder <sup>d</sup>, Weilin Huang <sup>d</sup> and Zhi Dang <sup>\*ab</sup>

<sup>a</sup> School of Environment and Energy, South China University of Technology,  
Guangzhou 510006, PR China

<sup>b</sup> The Key Lab of Pollution Control and Ecosystem Restoration in Industry Clusters,  
Ministry of Education, South China University of Technology, Guangzhou 510006, PR  
China

<sup>c</sup> School of Chemistry and Chemical Engineering, South China University of  
Technology, Guangzhou 510006, PR China

<sup>d</sup> Department of Environmental Sciences, Rutgers University, New Brunswick, NJ  
08901, USA

**19 pages, 4 texts, 12 figures, 9 tables**

---

\* E-mail: [clguo@scut.edu.cn](mailto:clguo@scut.edu.cn), [chzdang@scut.edu.cn](mailto:chzdang@scut.edu.cn); Phone/fax: +86-20-39380508

## CONTENTS

|                                                                                                     |     |
|-----------------------------------------------------------------------------------------------------|-----|
| Text S1. Modeling Periodic Structure.....                                                           | S3  |
| Text S2. Calculations of Cr(VI) adsorption energy.....                                              | S5  |
| Text S3. Adsorption kinetics and isotherms.....                                                     | S6  |
| Text S4. Structural characterization of lepidocrocite bulk and facets.....                          | S7  |
| Figure S1. Possible metallogenic processes of P-LEP and R-LEP.....                                  | S8  |
| Figure S2. Optimized bulk and facet structures of lepidocrocite.....                                | S9  |
| Figure S3. Images of the water droplets on lepidocrocite surfaces.....                              | S10 |
| Figure S4. Adsorption isotherm of Cr(VI) on P-LEP and R-LEP.....                                    | S10 |
| Figure S5. pH adsorption edges and zeta potentials for P-LEP and R-LEP.....                         | S10 |
| Figure S6. The effects of ionic strength on Cr(VI) adsorption.....                                  | S11 |
| Figure S7. Cr K-edge XANES spectra of adsorbed Cr(VI) on P-LEP and R-LEP.....                       | S11 |
| Figure S8. Decomposition spectra of adsorbed Cr(VI) on LEP.....                                     | S11 |
| Figure S9. ATR-FTIR spectra of Cr(VI) adsorbed on lepidocrocite under different ionic strength..... | S12 |
| Figure S10. Different optimized adsorption configurations on cluster models.....                    | S12 |
| Figure S11 Geometry-optimized periodic models of Cr(VI) adsorbed to {010} facet.....                | S13 |
| Figure S12 Geometry-optimized periodic models of Cr(VI) adsorbed to {001} facet.....                | S13 |
| Table S1. Kinetics parameters of Cr(VI) adsorption onto P-LEP and R-LEP.....                        | S14 |
| Table S2. Equilibrium adsorption isotherm fitting parameters.....                                   | S14 |
| Table S3. The fitting results of EXAFS spectroscopy.....                                            | S14 |
| Table S4. Calculated frequency of Cr(VI) adsorption on {100} lepidocrocite facet.....               | S15 |
| Table S5. Adsorption energy of Cr(VI) on lepidocrocite {010} facet.....                             | S15 |
| Table S6. Adsorption energy of Cr(VI) on lepidocrocite {001} facet.....                             | S16 |
| Table S7. Comparison of different reactions energies considered at the neutral facets.....          | S17 |
| Table S8. Structural parameters of Cr(VI) adsorption configuration on {010} facet.....              | S18 |
| Table S9. Structural parameters of Cr(VI) adsorption configurations on {001} facet.....             | S18 |
| References.....                                                                                     | S19 |

## Text S1. Modeling Periodic Structure

Lepidocrocite bulk was optimized from the initial structural data<sup>1</sup> using the methods described in the section 2.6.1. After the geometry optimization, to prevent interactions between the surfaces and their periodic images, the corresponding system was then modeled in a supercell geometry with a vacuum of at least 15 Å between the surface slabs. Calculations were conducted on the {010} and {001} lepidocrocite facets. For the {010} periodic model, two lepidocrocite sheets (each one composed by eight atomic layers) were considered for calculation on the {010} lepidocrocite surface.<sup>2</sup> To investigate the variation of surface coverage of adsorbed Cr(VI) complexes, the lateral periodicity is extended to (2 × 2) for the surface of lepidocrocite {010} with respect to models of the clean FeOOH surfaces.<sup>2, 3</sup> In the adsorption study, considering a good compromise between calculation time and the convergence quality, the six first layers of the atoms would be released, which is, and the system was consisted of Fe<sub>16</sub>O<sub>32</sub>H<sub>16</sub> measuring 7.7×6.2×27.1 Å<sup>3</sup>. For the {001} periodic model, two zigzag sheets were cleaved (1 × 2) as the model of {001} lepidocrocite facet refers to the report of Otte et al.<sup>6</sup> Nine first layers of atoms would be released to conduct the adsorption study, and the system was consisted of Fe<sub>16</sub>O<sub>40</sub>H<sub>24</sub> measuring 6.2×12.5×25.5 Å<sup>3</sup>. All the systems have considered a dipolar correction to correct for spurious dipolar interactions induced by the use of asymmetric slabs in the supercell approach.<sup>4</sup>

Due to the difficulty in accounting for charged species and surfaces under different solution pH at the water/oxide surface by the DFT calculations in a vacuum. According to the previous study,<sup>2</sup> three types of surfaces, including neutral, hydrated, and deprotonated, were constructed to model different pH situations. In addition, the

surfaces need to be kept neutral due to the known difficulty in dealing charged systems in periodic structures. The “hydrated” surface denoted the acidic conditions, which was modeled by adding a H atom to an OH surface group, whereas the “deprotonated” surface represented the alkaline environment, it could be modeled by eliminating a H atom from an OH surface group.

For Cr(VI) adsorption on the {010} lepidocrocite facet, a total of 13 coordination modes, including monodentate and bidentate complexes, were chosen to investigate appropriate surface structures formed on the {010} LEP facet under different surface coverage and hydrogenation. The effect of surface coverage could be modeled by inserting a second complex on the surface. The influence of pH was modeled by changing the hydrogenation state of surface terminal groups and Cr(VI)-adsorbed species. For the Cr(VI) adsorption configurations on the {001} facet, a total of 14 configurations extended by monodentate and bidentate geometries were tested. The variable conditions could be modeled according to the above description. Therefore, the effects of surface functional groups on the distribution of Cr(VI) species on different lepidocrocite facets could be described by DFT+U methods.

## Text S2. Calculations of Cr(VI) adsorption energy

The Cr(VI) adsorption energies were calculated by considering neutral reactants and products under the ligand exchange reaction. For example, the adsorption reaction considered for the substitution of one OH ligand is

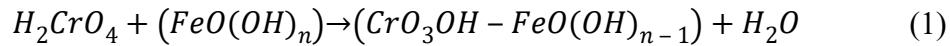

The adsorption energy ( $E_{ads}$ ) of Cr(VI) at lepidocrocite surfaces in [eV/molecule] is described as

$$E_{ads} = \frac{1}{n}(E_{facet-ads} - E_{facet} - nE_{H_2CrO_4}) \quad (2)$$

where  $n$  is the initial number of hydroxyl groups on the surface.  $E_{facet}$  is the total energy of specific facet;  $E_{facet-ads}$  is the total energy of the specific surfaces with adsorbing Cr(VI). The total energies of isolated species (water,  $CrO_4H_2$ , etc.) are selected as the reference energies, which are calculated in a box of  $10 \times 10 \times 10 \text{ \AA}^3$ .<sup>3</sup>

### Text S3. Adsorption kinetic and isotherms

The Cr(VI) adsorption processes were well described by using the following Pseudo-second-order kinetic model.

*Pseudo-second-order kinetic model*

$$\frac{t}{Q_t} = \frac{1}{K_2 Q_e^2} + \frac{t}{Q_e} \quad (1)$$

Where  $Q_e$  and  $Q_t$  (mg/g) are the amount of adsorbed metals on lepidocrocite at equilibrium and  $t$  min, respectively.  $K_1$  is the first order rate constant (1/min).  $K_2$  (g/mg/min) is the rate constant of pseudo-second-order.<sup>5</sup>

The adsorption equilibrium was described by using the following two isotherm models.

*Langmuir adsorption isotherm model*

$$Q_e = \frac{Q_m K_L C_e}{1 + K_L C_e} \quad (2)$$

where  $C_e$  is the equilibrium concentration of Cr(VI) ions (mg/L),  $Q_e$  is the amount of Cr(VI) adsorbed per unit surface area of the lepidocrocite nanoarchitectures at equilibrium (mg/m<sup>2</sup>),  $Q_m$  (mg/m<sup>2</sup>) is the maximum adsorption capacity, and  $K_L$  (L/mg) is the equilibrium constant.<sup>6</sup>

*Freundlich adsorption isotherm model*

$$Q_e = K_F C_e^{1/n} \quad (3)$$

where  $K_F$  ((mg/m<sup>2</sup>)(mg/L)<sup>n</sup>) and  $1/n$  are Freundlich constants related to adsorption capacity and adsorption intensity, respectively.<sup>7</sup>

#### Text S4. Structural characterization of lepidocrocite bulk and facets

The stabilized initial structure of the lepidocrocite bulk and surface were calculated and presented in Fig. S11. The lattice parameters obtained for the lepidocrocite bulk,  $a = 3.08 \text{ \AA}$ ,  $b = 12.5 \text{ \AA}$ , and  $c = 3.87 \text{ \AA}$  (Fig. S2a), are in good agreement with the DFT calculation data ( $a = 3.09 \text{ \AA}$ ,  $b = 12.54 \text{ \AA}$ , and  $c = 3.88 \text{ \AA}$ ) and experimental data ( $a = 3.08 \text{ \AA}$ ,  $b = 12.50 \text{ \AA}$ , and  $c = 3.87 \text{ \AA}$ ) described in the previous reports.<sup>2</sup> Different possibilities for Cr(VI) coordination modes depend on the orientation of  $\text{Fe}(\text{O},\text{OH})_6$  octahedra at the iron oxide facets and the surface iron site.<sup>8</sup>  $\{010\}$  is the predominant exposed facet, which presents a 4-fold coordinated Fe2 site (Fig. S2b), providing a  $\mu_2$  terminated site for possibly forming a monodentate binuclear (MB) or bidentate mononuclear (BM, <sup>2</sup>E) geometry on this facet. Moreover, there are four  $\mu_2$  terminated sites at the surface structure of the cell ( $2 \times 2$ ), and the surface consists of distorted octahedra with long bands ( $2.12 \text{ \AA}$ ) directed within the bulk and short bands ( $2.05 \text{ \AA}$ ) toward the surface. The adsorption sites are separated by a small distance of  $3.08 \text{ \AA}$  on the edge of an octahedron and by  $3.87 \text{ \AA}$  between corners of two different octahedra, which is a relatively longer distance than the present edge distances from  $2.61$  to  $2.89 \text{ \AA}$  and may consequently be a disadvantage for the formation of bidentate mononuclear (BM) complexes.

For the  $\{001\}$  facet structure, which acted as a 5-fold coordinated Fe2 site, the  $\mu_1$  terminated sites mainly contributed to the formation of Cr(VI) monodentate mononuclear (MM, <sup>1</sup>V) and bidentate binuclear (BB, <sup>2</sup>C) adsorption configurations (Fig. S2c). Four  $\mu_1$ -terminated sites existed on the cell ( $1 \times 2$ ), and the intersite distances included small distances and long distances of  $2.02$  and  $2.21 \text{ \AA}$ , respectively. The distances in the  $\langle 100 \rangle$  direction of the two neighboring octahedra varied from  $2.38$  to  $3.76 \text{ \AA}$ ; however, they were shorter than those in the  $\langle 010 \rangle$  direction (approximately

6.51 Å). Therefore, the interfacial Cr(VI) adsorption reactions only occurred on the active sites parallel to the  $\langle 100 \rangle$  direction instead of the  $\langle 010 \rangle$  direction.



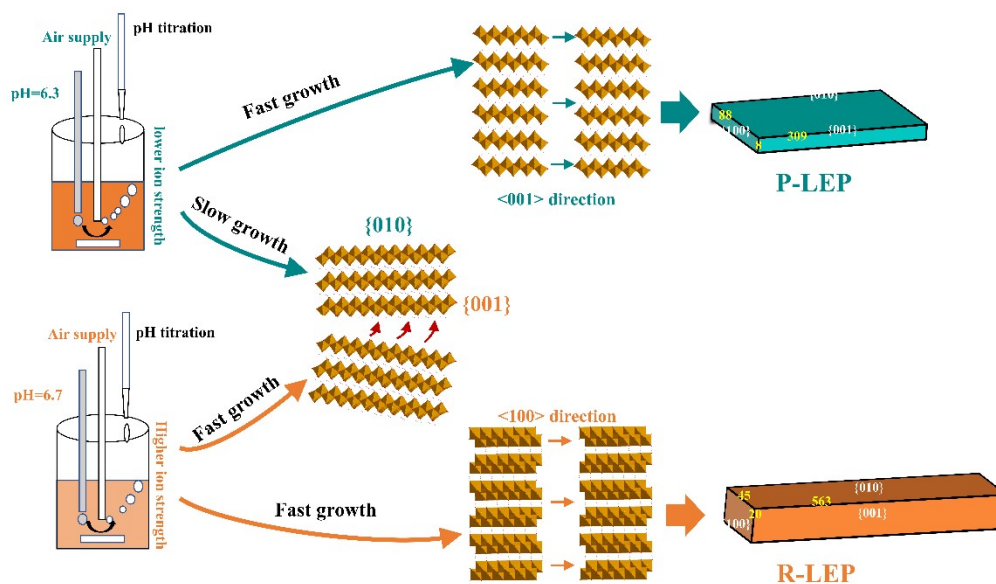

**Figure S1.** Possible metallogenic processes and facet distributions of P-LEP and R-LEP.

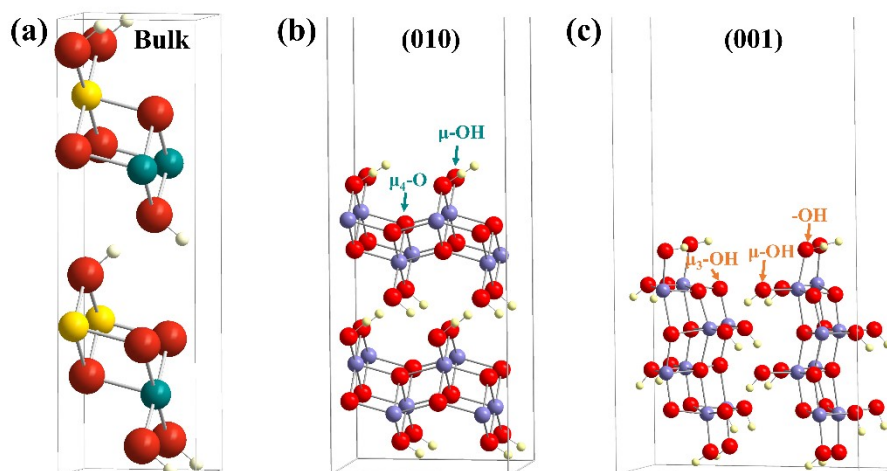

**Figure S2.** Optimized bulk and surface structure of lepidocrocite, (a) bulk structure in which yellow and dark green spheres represent iron atoms in spin (down) and spin (up) states, respectively, (b) (010) lepidocrocite facet, and (c) (001) lepidocrocite facet. The red spheres, blue spheres and white spheres represent oxygen, iron and hydrogen atoms, respectively.

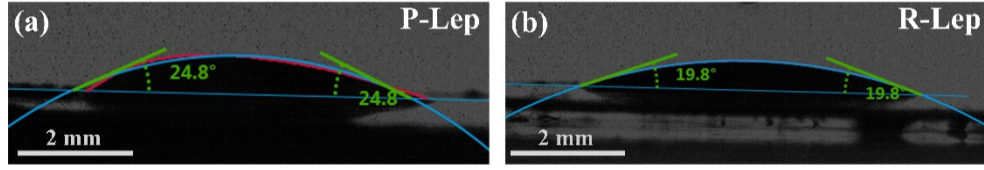

**Figure S3.** Images of the water droplets on LEP surfaces. (a) P-LEP/H<sub>2</sub>O and (b) R-LEP/H<sub>2</sub>O.

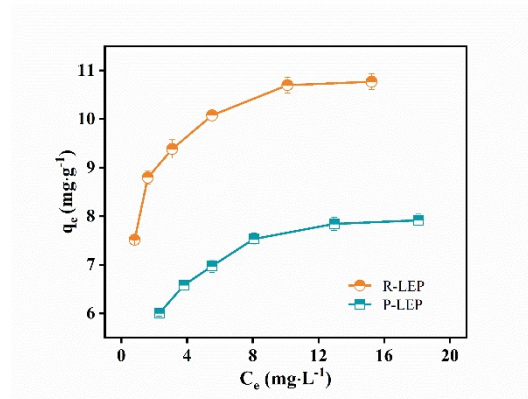

**Figure S4.** Adsorption isotherm of Cr(VI) on P-LEP and R-LEP. The initial Cr(VI) concentration ranged from 8.32 to 26.0 mg·L<sup>-1</sup>. The solution pH was 5.0, and the dosage of R-LEP and P-LEP was 1.0 g·L<sup>-1</sup>. The ionic strength was 0.01 M NaCl.

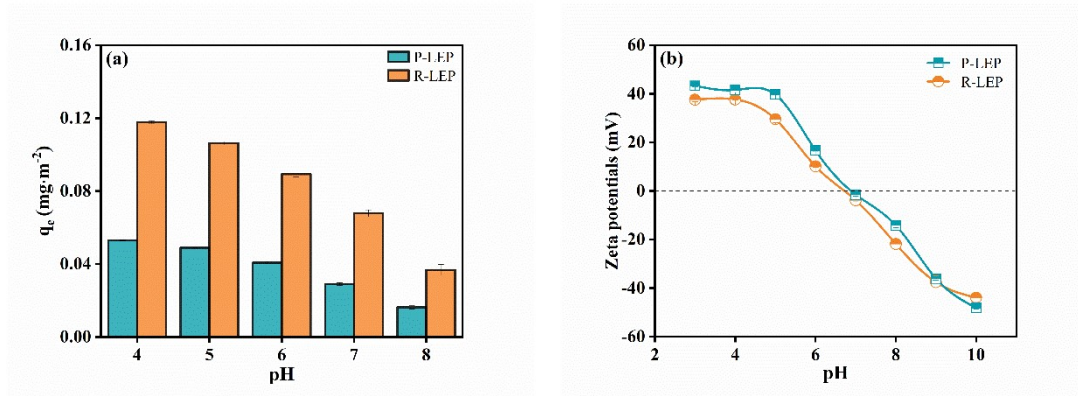

**Figure S5.** pH adsorption edges for P-LEP and R-LEP (a). The concentrations of Cr(VI) and LEP was 10.4 mg·L<sup>-1</sup> and 1.0 g·L<sup>-1</sup>, respectively. The ionic strength was 0.01 M NaCl. The effects of pH on the zeta potential of P-LEP and R-LEP (b).

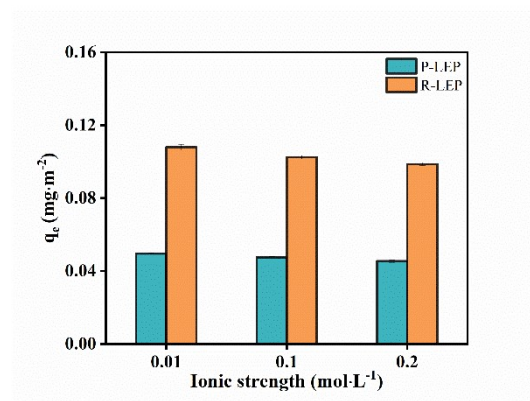

**Figure S6.** The effects of ionic strength on Cr(VI) adsorption on R-LEP and R-LEP surfaces. The solution pH was 5.0, the concentrations of Cr(VI) and LEP was 10.4 mg·L<sup>-1</sup> and 1.0 g·L<sup>-1</sup>, respectively.

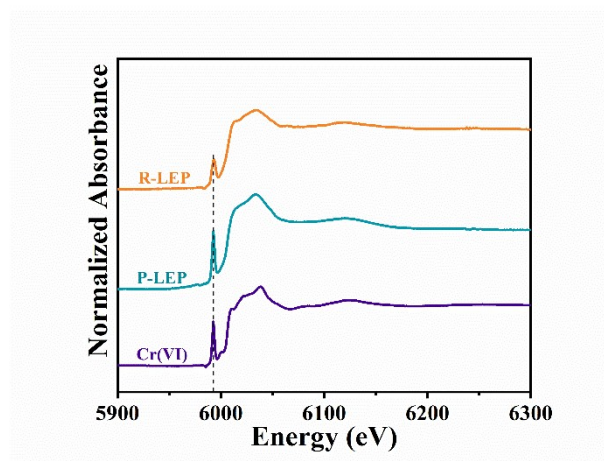

**Figure S7.** Cr K-edge XANES spectra of adsorbed Cr(VI) on P-LEP and R-LEP, weighted by  $k^3$ .

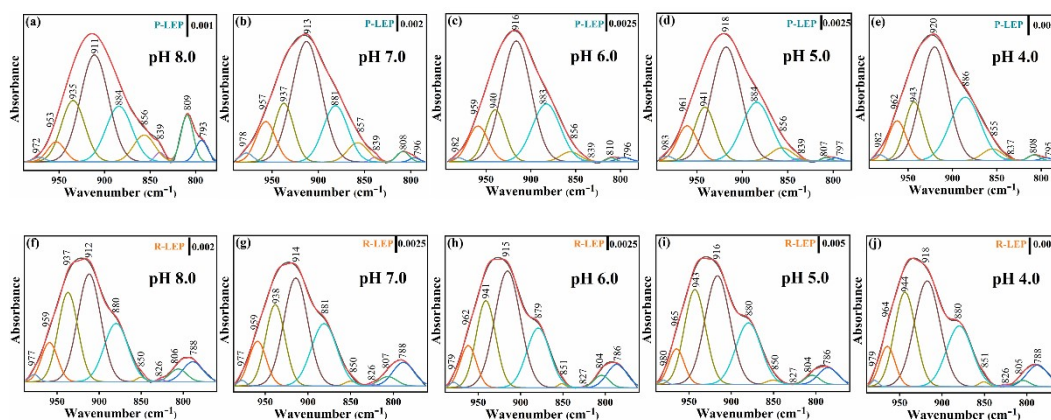

**Figure S8.** Decomposition spectra of adsorbed Cr(VI) on P-LEP and R-LEP surfaces at pH 8.0, 7.0, 6.0, 5.0, and 4.0 at equilibrium.

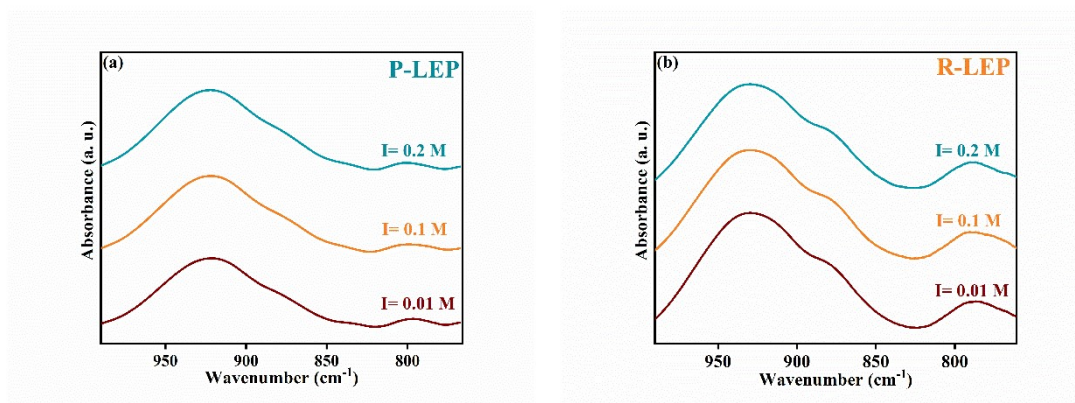

**Figure S9.** ATR-FTIR spectra of Cr(VI) adsorbed on P-LEP and R-LEP under different ionic strength: 0.01, 0.1, and 0.2 M NaCl. The solution pH was pH 5.0.

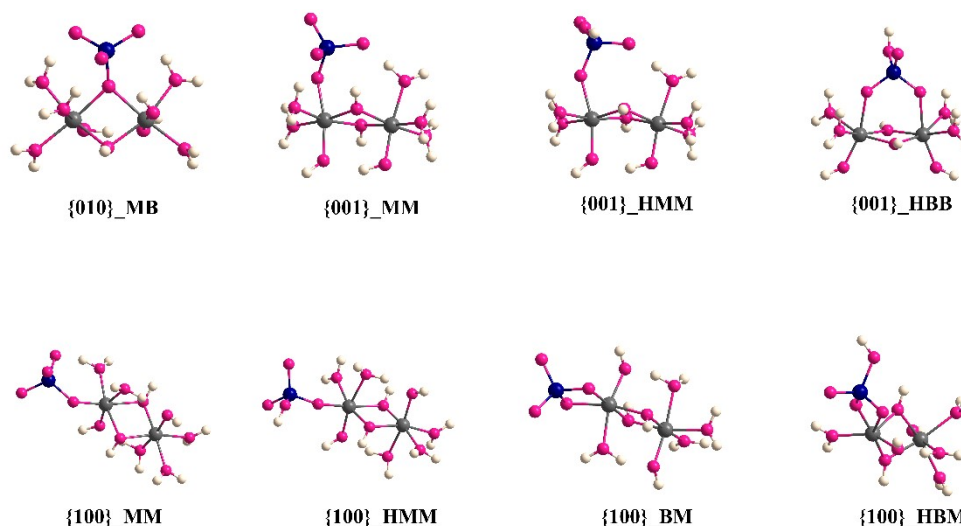

**Figure S10.** Different optimized adsorption configurations on cluster models extracted from lepidocrocite facets. Monodentate binuclear complexes on {010} facet denoted {010}\_MB; nonprotonated and protonated monodentate mononuclear complexes on {001} facet denoted {001}\_MM and {001}\_HMM, respectively; {001}\_HBB: protonated bidentate binuclear complexes on {001} facet; nonprotonated and protonated monodentate mononuclear complexes on {100} facet denoted {100}\_MM and {100}\_HMM respectively; nonprotonated and protonated bidentate binuclear complexes on {100} facet denoted {100}\_BB and {100}\_HBB.



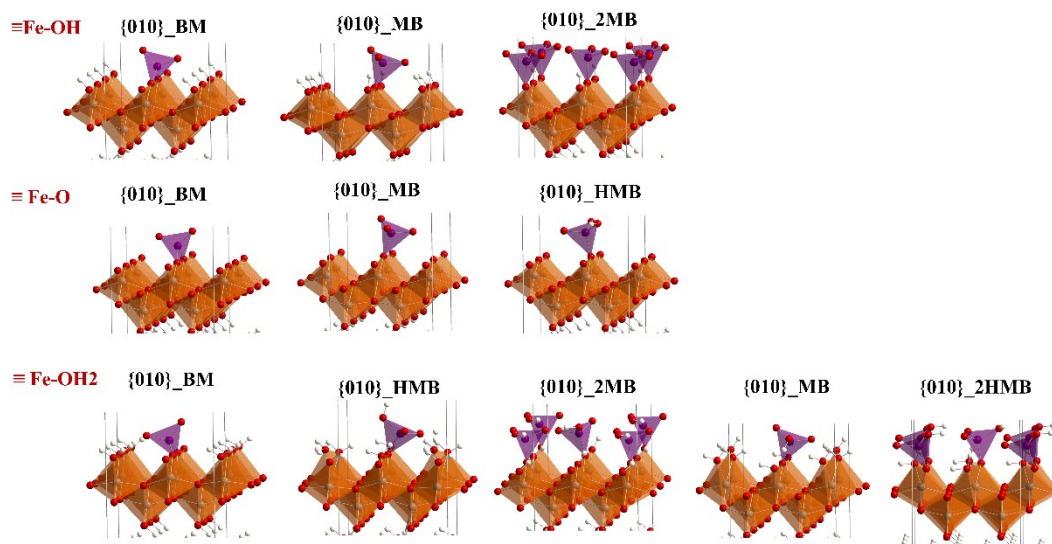

**Figure S11.** Geometry-optimized periodic models of Cr(VI) adsorbed to {010} lepidocrocite facet.  $\equiv\text{Fe-OH}$ ,  $\equiv\text{Fe-O}$ ,  $\equiv\text{Fe-OH}_2$  represented fully hydroxylated neutral surface, fully deprotonated surface, and fully hydrated surface.

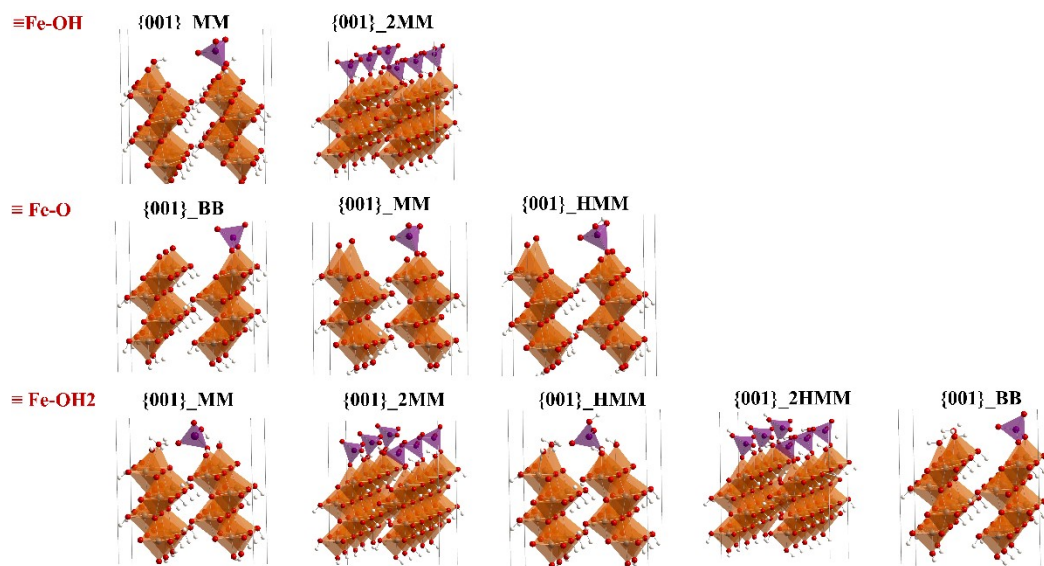

**Figure S12.** Geometry-optimized periodic models of Cr(VI) adsorbed to {001} lepidocrocite facet.  $\equiv\text{Fe-OH}$ ,  $\equiv\text{Fe-O}$ ,  $\equiv\text{Fe-OH}_2$  represented fully hydroxylated neutral surface, fully deprotonated surface, and fully hydrated surface.

**Table S1.** Kinetics parameters of Cr(VI) adsorption onto P-LEP and R-LEP.

|       | SSA (m <sup>2</sup> ·g <sup>-1</sup> ) | q <sub>e</sub> (mg·m <sup>-2</sup> ) | K <sub>2</sub> (m <sup>2</sup> ·mg <sup>-1</sup> ·min <sup>-1</sup> ) | K <sub>2</sub> (g·mg <sup>-1</sup> ·min <sup>-1</sup> ) | R <sup>2</sup> |
|-------|----------------------------------------|--------------------------------------|-----------------------------------------------------------------------|---------------------------------------------------------|----------------|
| P-LEP | 177                                    | 0.045                                | 37.17                                                                 | 0.184                                                   | 0.9999         |
| R-LEP | 61                                     | 0.098                                | 31.85                                                                 | 0.455                                                   | 0.9996         |

**Table S2** Equilibrium adsorption isotherm fitting parameters.

| Models     | Parameters                           | P-LEP | R-LEP |
|------------|--------------------------------------|-------|-------|
| Langmuir   | q <sub>m</sub> (mg·m <sup>-2</sup> ) | 0.062 | 0.137 |
|            | K <sub>L</sub> (L·mg <sup>-1</sup> ) | 2.60  | 1.04  |
|            | R <sup>2</sup>                       | 0.97  | 0.98  |
| Freundlich | 1/n                                  | 0.115 | 0.135 |
|            | K <sub>F</sub>                       | 0.046 | 0.090 |
|            | R <sup>2</sup>                       | 0.94  | 0.94  |

**Table S3.** EXAFS fitting parameters at the Cr K-edge for various samples ( $S_0^2=0.860$ )

| Sample | Shell  | CN <sup>a</sup> | R(Å) <sup>b</sup> | σ <sup>2</sup> (Å <sup>2</sup> ) <sup>c</sup> | ΔE <sub>0</sub> (eV) <sup>d</sup> | R factor |
|--------|--------|-----------------|-------------------|-----------------------------------------------|-----------------------------------|----------|
| P-LEP  | Cr-O   | 4               | 1.68              | 0.003                                         | -7.7                              | 0.014    |
|        | Cr-O-O | 12              | 2.50              |                                               |                                   |          |
|        | Cr-Fe1 | 1.7             | 3.23              |                                               |                                   |          |
|        | Cr-Fe2 | 0.6             | 3.60              |                                               |                                   |          |
| R-LEP  | Cr-O   | 4               | 1.67              | 0.006                                         | -7.9                              | 0.009    |
|        | Cr-O-O | 12              | 2.50              |                                               |                                   |          |
|        | Cr-Fe1 | 1.8             | 3.15              |                                               |                                   |          |
|        | Cr-Fe2 | 0.4             | 3.60              |                                               |                                   |          |

<sup>a</sup>CN, coordination number; <sup>b</sup>R, distance between absorber and backscatter atoms; <sup>c</sup>σ<sup>2</sup>, Debye-Waller factor to account for both thermal and structural disorders; <sup>d</sup>ΔE<sub>0</sub>, inner potential correction; R factor indicates the goodness of the fit.  $S_0^2$  was fixed to 0.860, according to the experimental EXAFS fit of Cr foil by fixing CN as the known crystallographic value. Fitting range:  $2.0 \leq k \text{ (}\text{\AA}^{-1}\text{)} \leq \sim 10$  and  $1 \leq R \text{ (}\text{\AA}\text{)} \leq 3.5$  (PLEP);  $2.0 \leq k \text{ (}\text{\AA}^{-1}\text{)} \leq 10$  and  $1.0 \leq R \text{ (}\text{\AA}\text{)} \leq 3.5$  (RLEP). A reasonable range of EXAFS fitting parameters:  $0.700 < S_0^2 < 1.000$ ;  $CN > 0$ ;  $\sigma^2 > 0 \text{ \AA}^2$ ;  $\Delta E_0 < 10 \text{ eV}$ ;  $R \text{ factor} < 0.02$ .

**Table S4.** Calculated Cr–O Stretching Frequencies ( $\text{cm}^{-1}$ ) of Chromate-Iron Oxide Clusters (UB3LYP/LANL2DZ)

| States         | MB <sub>{010}</sub> | MM <sub>{001}</sub> | BB <sub>{001}</sub> | MM <sub>{100}</sub> | BM <sub>{100}</sub> |
|----------------|---------------------|---------------------|---------------------|---------------------|---------------------|
| Non-protonated | 942                 | 960                 | 952                 | 952                 | 969                 |
|                | 915                 | 894                 | 929                 | 943                 | 948                 |
|                | 894                 | 869                 | 834                 | 933                 | 939                 |
|                | 875                 | 827                 | 807                 | 866                 | 797                 |
| Protonated     | 989                 | 996                 | 970                 | 1000                | 1003                |
|                | 956                 | 943                 | 890                 | 974                 | 964                 |
|                | 886                 | 908                 | 874                 | 944                 | 940                 |
|                | 845                 | 886                 | 831                 | 863                 | 838                 |

**Table S5.** Reactions considered for the adsorption energy calculations and corresponding values obtained for Cr(VI) adsorption on lepidocrocite {010} facet in the gas phase. The most stable configurations considered in the article are given in bold letters. The total energies of isolated species (water,  $\text{H}_2\text{CrO}_4$  ...) needed as reference energies, are calculated in a box of  $10 \times 10 \times 10 \text{ \AA}^3$ .

| System | Modes | Energetic calculations                                                                            | E <sub>ads</sub> (eV) |
|--------|-------|---------------------------------------------------------------------------------------------------|-----------------------|
| OH     | MB    | $(E_{s-a} + 0.5E_{\text{H}_2} + E_{\text{H}_2\text{O}}) - (E_s + E_{\text{H}_2\text{CrO}_4})$     | 1.54                  |
|        | HMB   | $(E_{s-a} + E_{\text{H}_2\text{O}}) - (E_s + E_{\text{H}_2\text{CrO}_4})$                         | <b>-0.35</b>          |
|        | 2MB   | $0.5[(E_{s-a} + E_{\text{H}_2} + 2E_{\text{H}_2\text{O}}) - (E_s + 2E_{\text{H}_2\text{CrO}_4})]$ | 2.16                  |
|        | 2HMB  | $0.5[(E_{s-a} + 2E_{\text{H}_2\text{O}}) - (E_s + 2E_{\text{H}_2\text{CrO}_4})]$                  | <b>-0.32</b>          |
|        | BM    | $(E_{s-a} + 2E_{\text{H}_2\text{O}}) - (E_s + E_{\text{H}_2\text{CrO}_4})$                        | 0.61                  |
| O      | MB    | $(E_{s-a} + 2E_{\text{H}_2} + E_{\text{H}_2\text{O}}) - (E_s + E_{\text{H}_2\text{CrO}_4})$       | 9.62                  |
|        | HMB   | $(E_{s-a} + 1.5E_{\text{H}_2} + E_{\text{H}_2\text{O}}) - (E_s + E_{\text{H}_2\text{CrO}_4})$     | 6.73                  |
|        | BM    | $(E_{s-a} + E_{\text{H}_2} + 2E_{\text{H}_2\text{O}}) - (E_s + E_{\text{H}_2\text{CrO}_4})$       | 5.49                  |
| OH2    | MB    | $(E_{s-a} + 0.5E_{\text{O}_2}) - (E_s + E_{\text{H}_2\text{CrO}_4})$                              | 1.52                  |
|        | HMB   | $(E_{s-a} + 0.5E_{\text{O}_2}) - (E_s + E_{\text{H}_2\text{CrO}_4} + 0.5E_{\text{H}_2})$          | 0.65                  |
|        | 2MB   | $0.5[(E_{s-a} + E_{\text{O}_2} + 2E_{\text{H}_2}) - (E_s + 2E_{\text{H}_2\text{CrO}_4})]$         | 2.84                  |
|        | 2HMB  | $0.5[(E_{s-a} + E_{\text{O}_2} + E_{\text{H}_2}) - (E_s + 2E_{\text{H}_2\text{CrO}_4})]$          | 1.99                  |
|        | BM    | $(E_{s-a} + 0.5E_{\text{O}_2} + E_{\text{H}_2\text{O}}) - (E_s + E_{\text{H}_2\text{CrO}_4})$     | 1.69                  |

MB, BM, HMB were denoted as monodentate binuclear, bidentate mononuclear, and protonated monodentate binuclear.

**Table S6.** Reactions considered for the adsorption energy calculations and corresponding values obtained for Cr(VI) adsorption on lepidocrocite {001} facet in the gas phase. The most stable configurations considered in the article are given in bold letters. The total energies of isolated species (water, H<sub>2</sub>CrO<sub>4</sub> ...) needed as reference energies, are calculated in a box of 10×10×10 Å<sup>3</sup>.

| System          | Modes | Energetic calculations                                 | E <sub>ads</sub> (eV) |
|-----------------|-------|--------------------------------------------------------|-----------------------|
| OH              | MM    | $(E_{s-a}+0.5E_{H_2}+E_{H_2O})-(E_s+E_{H_2CrO_4})$     | 1.88                  |
|                 | HMM   | $(E_{s-a}+E_{H_2O})-(E_s+E_{H_2CrO_4})$                | <b>-0.35</b>          |
|                 | 2MM   | $0.5[(E_{s-a}+E_{H_2}+2E_{H_2O})-(E_s+2E_{H_2CrO_4})]$ | 2.33                  |
|                 | 2HMM  | $0.5[(E_{s-a}+2E_{H_2O})-(E_s+2E_{H_2CrO_4})]$         | <b>-0.32</b>          |
|                 | BB    | $(E_{s-a}+2E_{H_2O})-(E_s+E_{H_2CrO_4})$               | <b>-0.61</b>          |
|                 | 2BB   | $0.5(E_{s-a}+4E_{H_2O})-(E_s+2E_{H_2CrO_4})$           | <b>-0.15</b>          |
| O               | MM    | $(E_{s-a}+2E_{H_2}+E_{H_2O})-(E_s+E_{H_2CrO_4})$       | 6.02                  |
|                 | HMM   | $(E_{s-a}+1.5E_{H_2}+E_{H_2O})-(E_s+E_{H_2CrO_4})$     | 3.70                  |
|                 | BB    | $(E_{s-a}+E_{H_2}+2E_{H_2O})-(E_s+E_{H_2CrO_4})$       | 4.41                  |
| OH <sub>2</sub> | MM    | $(E_{s-a}+0.5E_{O_2})-(E_s+E_{H_2CrO_4})$              | -22.36                |
|                 | HMM   | $(E_{s-a}+0.5E_{O_2})-(E_s+E_{H_2CrO_4}+0.5E_{H_2})$   | -23.90                |
|                 | 2MM   | $0.5[(E_{s-a}+E_{O_2}+2E_{H_2})-(E_s+2E_{H_2CrO_4})]$  | 2.54                  |
|                 | 2HMM  | $0.5[(E_{s-a}+E_{O_2}+E_{H_2})-(E_s+2E_{H_2CrO_4})]$   | -0.02                 |
|                 | BB    | $(E_{s-a}+0.5E_{O_2}+E_{H_2O})-(E_s+E_{H_2CrO_4})$     | -2.43                 |

MM, BB, and HMM were denoted as monodentate mononuclear, bidentate binuclear, and protonated monodentate mononuclear.



**Table S7.** Comparison of different reactions energies considered at the neutral (OH terminated) {010} and {001} facets, taking into account the product (H<sub>2</sub>O) solvation free energy.

| System                    | N <sub>H</sub> <sup>a</sup> | N <sub>H<sub>2</sub>O</sub> <sup>b</sup> | E <sub>gas-ads</sub> <sup>c</sup> (eV) | E <sub>Liq-ads</sub> <sup>d</sup> (eV) | ΔΔE <sub>liq</sub> <sup>e</sup> (eV) |
|---------------------------|-----------------------------|------------------------------------------|----------------------------------------|----------------------------------------|--------------------------------------|
| <i><b>{010} Facet</b></i> |                             |                                          |                                        |                                        |                                      |
| HMB                       | 0                           | 1                                        | -0.35                                  | -0.80                                  | 0                                    |
| MB                        | 0                           | 2                                        | 0.61                                   | -0.29                                  | 0.51                                 |
| 2HMB                      | 0                           | 1                                        | -0.32                                  | -0.77                                  | 0.03                                 |
| <i><b>{001} Facet</b></i> |                             |                                          |                                        |                                        |                                      |
| HMM                       | 0                           | 1                                        | -0.35                                  | -0.80                                  | 0                                    |
| BB                        | 0                           | 2                                        | -0.61                                  | -1.51                                  | -0.71                                |
| 2HMM                      | 0                           | 1                                        | -0.32                                  | -0.77                                  | 0.03                                 |
| 2BB                       | 0                           | 2                                        | -0.15                                  | -1.05                                  | -0.25                                |

<sup>a</sup> denotes the number of protons released; <sup>b</sup> Number of water molecules released; <sup>c</sup> Gas phase reaction; <sup>d</sup> means that the E<sub>Liq-ads</sub> = E<sub>gas-ads</sub> – 0.45n, and the “n” denoted the number of water; <sup>e</sup> means the difference in adsorption energy from the liquid phase between the two coordination modes.

**Table S8.** Structural parameters of Cr(VI) adsorption configurations on {010} lepidocrocite facet.

| Terminated<br>Groups  | Modes       | d <sub>Fe-Cr</sub> (Å) | d <sub>Fe-O</sub> (Å) | d <sub>Cr-O</sub> (Å) | ∠ <sub>Fe-O-Cr</sub> (°)       |
|-----------------------|-------------|------------------------|-----------------------|-----------------------|--------------------------------|
| <i>OH</i>             | MB          | 3.40/3.42              | 1.97/1.99             | 1.82                  | 127.25/127.51                  |
|                       | <b>HMB</b>  | 3.48/3.49              | 2.14/2.11             | 1.71                  | 130.48/131.06                  |
|                       | <b>2HMB</b> | 3.44/3.52              | 2.06/2.08             | 1.75                  | 127.80/134.63                  |
|                       | BM          | 2.68                   | 2.09/2.10             | 1.75/1.75             | 88.11/87.91                    |
| <i>O</i>              | MB          | 3.40/3.47              | 2.00/2.05             | 1.80                  | 126.72/128.21                  |
|                       | HMB         | 3.45/3.45              | 2.01/2.08             | 1.78                  | 126.34/130.73                  |
|                       | BM          | 2.67                   | 2.06/2.06             | 1.79                  | 87.63/87.73                    |
| <i>OH<sub>2</sub></i> | MB          | 3.45/3.50              | 2.12/2.14             | 1.70                  | 128.83/131.19                  |
|                       | HMB         | 3.35/3.42              | 2.05/2.11             | 1.76                  | 119.75/129.43                  |
|                       | 2MB         | 3.46/3.51/3.51         | 2.07/2.07/2.09/2.10   | 1.74/1.75             | 129.44/130.89<br>130.98/133.25 |
|                       | 2HMB        | 3.68/3.57<br>3.40/3.58 | 2.17/2.19/2.23/2.24   | 1.71/1.72             | 120.71/133.98<br>129.55/138.47 |
|                       | BM          | 2.76                   | 2.18/2.19             | 1.70                  | 89.92/89.59                    |
|                       |             |                        |                       |                       |                                |

**Table S9.** Structural parameters of Cr(VI) adsorption configurations on {001} lepidocrocite facet.

| Terminated<br>Groups   | Modes       | d <sub>Fe-Cr</sub> (Å) | d <sub>Fe-O</sub> (Å) | d <sub>Cr-O</sub> (Å) | ∠ <sub>Fe-O-Cr</sub> (°) |
|------------------------|-------------|------------------------|-----------------------|-----------------------|--------------------------|
| <i>-OH</i>             | MM          | 3.40                   | 1.87                  | 1.72                  | 141.35                   |
|                        | <b>HMM</b>  | 3.42                   | 1.88                  | 1.72                  | 143.14                   |
|                        | 2MM         | 3.52/3.56              | 1.84/1.86             | 1.71/1.72             | 163.61/173.36            |
|                        | <b>2HMM</b> | 3.56/3.57              | 1.84/1.86             | 1.71/1.73             | 173.25/174.49            |
|                        | <b>BB</b>   | 3.29/3.30              | 1.93/1.94             | 1.69/1.70             | 131.07/129.87            |
|                        | <b>2BB</b>  | 3.28/3.32              | 1.91/1.95             | 1.69/1.71             | 130.43/131.27            |
| <i>-O</i>              | MM          | 3.41                   | 1.86                  | 1.72                  | 144.11                   |
|                        | HMM         | 3.39                   | 1.87                  | 1.73                  | 140.62                   |
|                        | BB          | 3.30/3.31              | 1.94/1.95             | 1.69/1.70             | 130.81/130.20            |
| <i>-OH<sub>2</sub></i> | MM          | 3.42                   | 1.97                  | 1.70                  | 136.92                   |
|                        | HMM         | 3.61                   | 2.20                  | 1.65                  | 139.27                   |
|                        | 2MM         | 3.49/3.52              | 1.91/1.96             | 1.69/1.72             | 146.16/150.54            |
|                        | 2HMM        | 3.53/3.55              | 1.96/1.97             | 1.67/1.72             | 149.77/150.98            |
|                        | BB          | 3.22                   | 1.88/1.91             | 1.72/1.73             | 125.08/125.91            |

## References

- (1) A.N. Christensen, M.S. Lehmann, P. Convert, L. Beyer, S.J. Cyvin, Deuteration of Crystalline Hydroxides. Hydrogen Bonds of  $\gamma$ -AlOO(H,D) and  $\gamma$ -FeOO(H,D). *Acta. Chem. Scand*, 1982, 36, 303-308.
- (2) A. Davantès, D. Costa, G. Lefèvre, Molybdenum(VI) Adsorption onto Lepidocrocite ( $\gamma$ -FeOOH): In Situ Vibrational Spectroscopy and DFT+U Theoretical Study. *J. Phys. Chem. C*, 2016, 120, 11871-11881.
- (3) K. Otte, W.W. Schmahl, R. Pentcheva, DFT+U Study of Arsenate Adsorption on FeOOH Surfaces: Evidence for Competing Binding Mechanisms. *J. Phys. Chem. C*, 2013, 117, 15571-15582.
- (4) D. Tunega, Theoretical Study of Properties of Goethite ( $\alpha$ -FeOOH) at Ambient and High-Pressure Conditions. *J. Phys. Chem. C*, 2012, 116, 6703–6713.
- (5) Y.S. Ho, G. McKay, Pseudo-second order model for sorption processes. *Process Biochem.*, 1999, 34, 451-465.
- (6) I. Langmuir, The constitution and fundamental properties of solids and liquids. Part 1. Solids. *J. Am. Chem. Soc.*, 1917, 38, 2221-2295.
- (7) H. Freundlich, Scientific Books: Colloid and Capillary Chemistry. *Science*, 1927, 65, 40-41.
- (8) S. Yin, D.E. Ellis, DFT studies of Cr(VI) complex adsorption on hydroxylated hematite surfaces, *Surf. Sci.*, 603 (2009) 736-746.
